# Supplementary material for: Comparative NanoUPLC-MSE analysis between magainin I-susceptible and -resistant Escherichia coli strains
Source: PubMed Central journal article supplement (PMC5482854; doi:10.1038/s41598-017-04181-y), 2017-06-23
Supplement: 41598_2017_4181_MOESM1_ESM.pdf [file 41598_2017_4181_MOESM1_ESM.pdf]

**Comparative NanoUPLC-MS<sup>E</sup> analysis between magainin I-susceptible and - resistant  
*Escherichia coli* strains**

Marlon H. Cardoso<sup>1,2,4†</sup>, Keyla C. de Almeida<sup>1,2†</sup>, Elizabete de S. Cândido<sup>1,4</sup>, André M. Murad<sup>3</sup>, Simoni C. Dias<sup>1</sup> and Octávio L. Franco<sup>1,2,4\*</sup>

<sup>1</sup>*Centro de Análises Proteômicas e Bioquímicas, Pós-Graduação em Ciências Genômicas e Biotecnologia, Universidade Católica de Brasília, Brasília- DF, 70.790-160, Brazil;*

<sup>2</sup>*Programa de Pós-Graduação em Patologia Molecular, Faculdade de Medicina, Universidade de Brasília, Brasília-DF, 70.910-900, Brazil;*

<sup>3</sup>*Embrapa Recursos Genéticos e Biotecnologia, Laboratório de biologia sintética, Parque Estação Biológica, Brasília-DF, 70.770-917, Brazil;*

<sup>4</sup>*S-Inova Biotech, Pós-graduação em Biotecnologia, Universidade Católica Dom Bosco, Campo Grande-MS, 79.117-900, Brazil.*

†These authors equally contributed to this article.

**\*Corresponding author:** Octávio Luiz Franco: Phone number: +55 61 34487167/ +55 61 34487220, Fax number: + 55 61 33474797, [ocfranco@gmail.com](mailto:ocfranco@gmail.com)

## Supplementary Materials

**Figure S1 - Uniformity of peptides between the two experimental conditions.** The log\_relative profile is the log of the fmol quantity of each peptide for each experimental condition (C1-3 and R1-3).

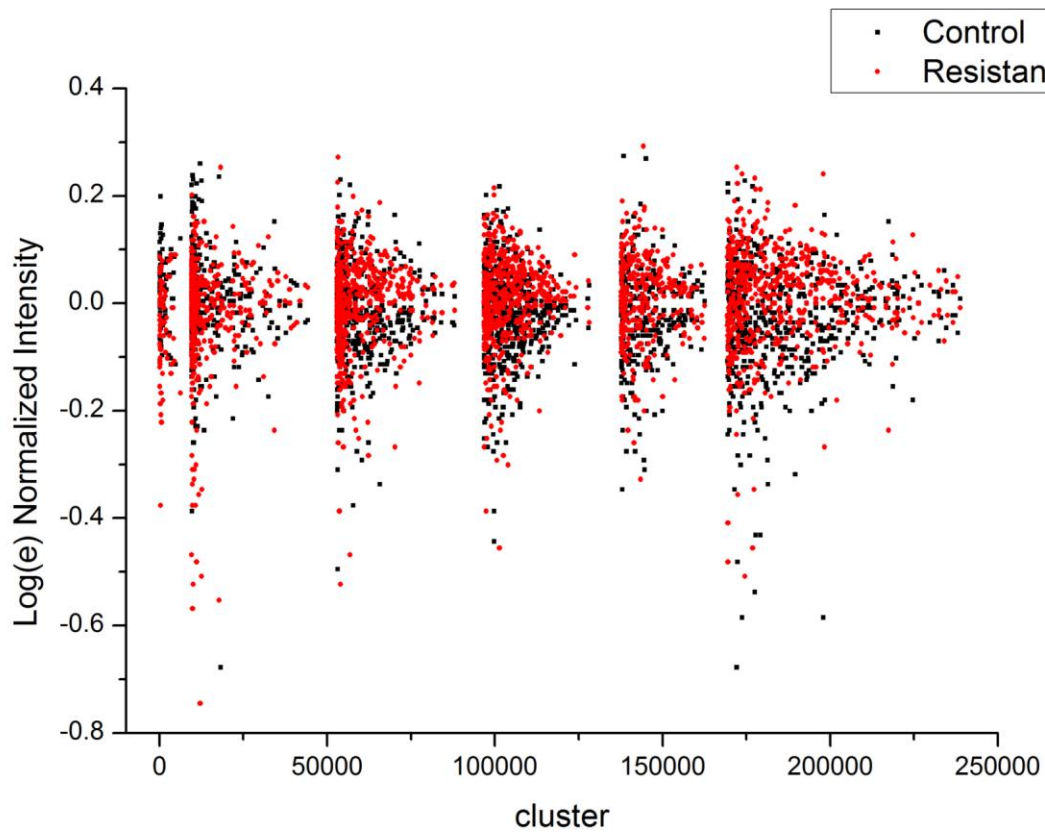

**Figure S2 - *E. coli* downregulated and upregulated proteins.** Magainin I-resistant *E. coli* differentially expressed proteins in comparison to –susceptible strains.

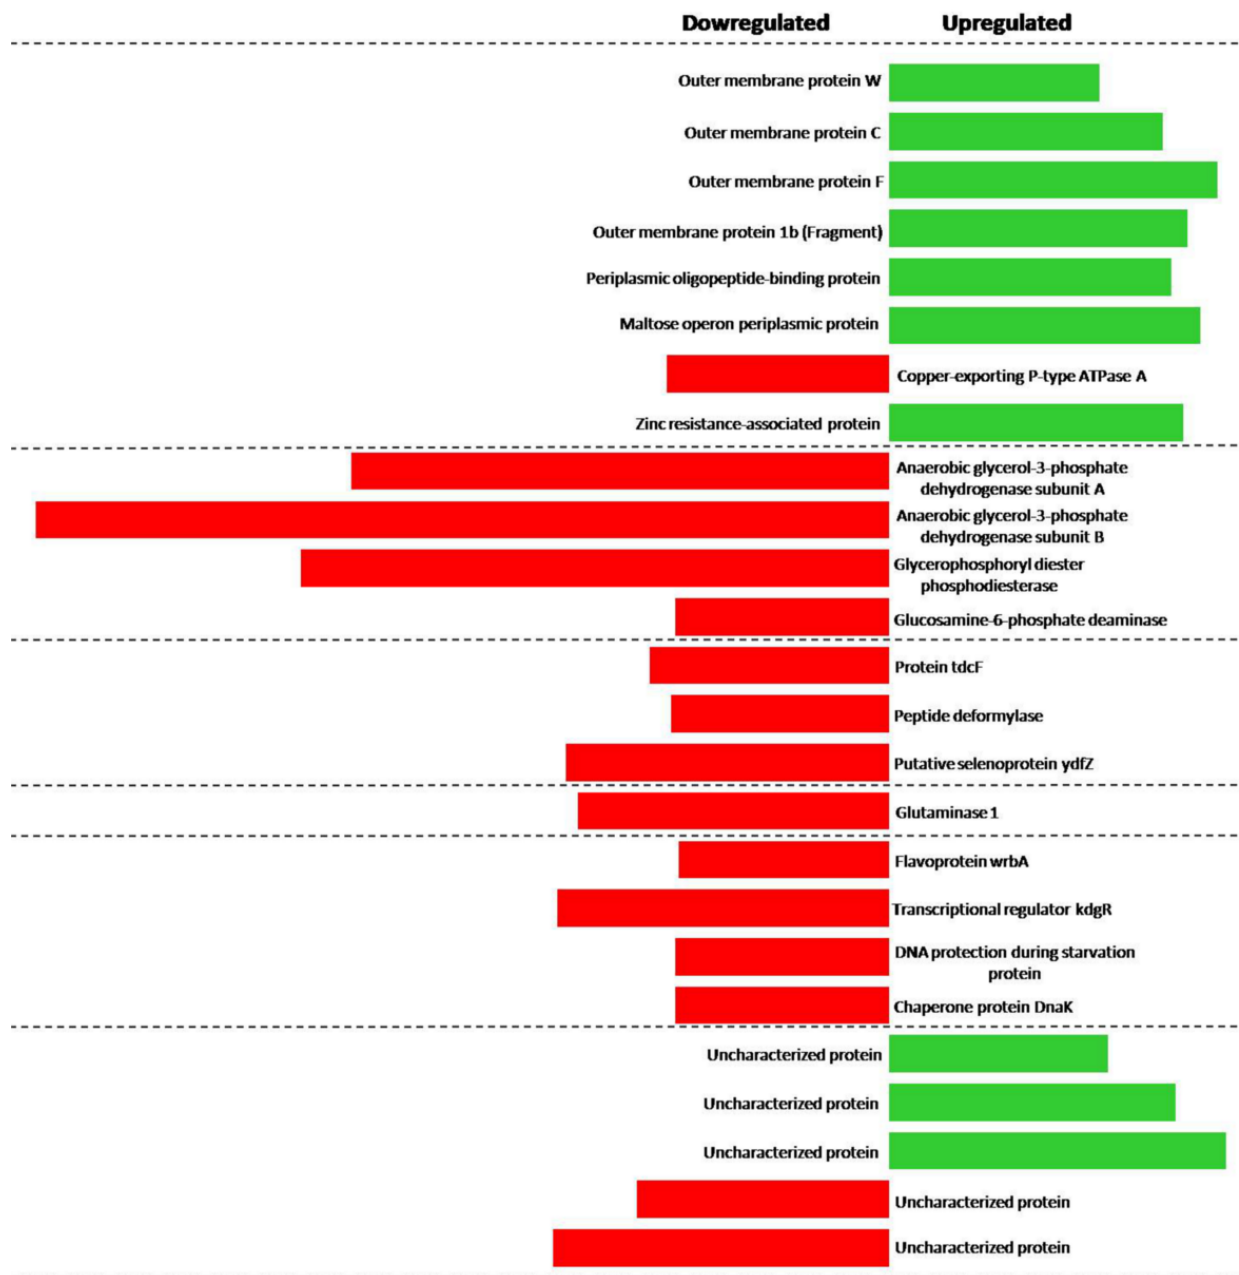

| <b>Table S1</b> – Exclusive proteins identified in the magainin I-resistant <i>E. coli</i> strains by nanoUPLC-MS <sup>E</sup> . |              |                                               |                             |
|----------------------------------------------------------------------------------------------------------------------------------|--------------|-----------------------------------------------|-----------------------------|
| <b>UniProt identification</b>                                                                                                    | <b>Score</b> | <b>Protein description</b>                    | <b>Biological processes</b> |
| PIFC_ECOLI                                                                                                                       | 353.62       | Transcriptional repressor PifC                | Transcription               |
| DGOR_ECOLI                                                                                                                       | 302.04       | Galactonate operon transcriptional repressor  | Transcription               |
| RHAS_ECOLI                                                                                                                       | 340.29       | HTH-type transcriptional activator RhaS       | Transcription               |
| FRLR_ECOLI                                                                                                                       | 423.25       | HTH-type transcriptional regulator FrlR       | Transcription               |
| MODE_ECOLI                                                                                                                       | 551.35       | Transcriptional regulator ModE                | Transcription               |
| TYRR_ECOLI                                                                                                                       | 201.23       | Transcriptional regulatory protein TyrR       | Transcription               |
| NSRR_ECOLI                                                                                                                       | 454.9        | HTH-type transcriptional repressor NsrR       | Transcription               |
| METR_ECOLI                                                                                                                       | 298.54       | HTH-type transcriptional regulator MetR       | Transcription               |
| TTCA_ECOLI                                                                                                                       | 345.25       | tRNA 2-thiocytidine biosynthesis protein TtcA | Translation                 |
| TMCA_ECOLI                                                                                                                       | 260.1        | tRNA(Met) cytidine acetyltransferase TmcA     | Translation                 |

|              |        |                                                        |                          |
|--------------|--------|--------------------------------------------------------|--------------------------|
| RSMI_ECOLI   | 254.85 | Ribosomal RNA small subunit methyltransferase I        | Translation              |
| XNI_ECOLI    | 417.1  | Flap endonuclease Xni                                  | Replication              |
| USPC_ECOLI   | 424.81 | Universal stress protein C                             | Replication and repair   |
| A5PFJ9_ECOLI | 286.78 | IS10 transposase                                       | Replication and repair   |
| RECJ_ECOLI   | 241.5  | Single-stranded-DNA-specific exonuclease RecJ          | Replication and repair   |
| EXOX_ECOLI   | 448.56 | Exodeoxyribonuclease 10                                | Replication and repair   |
| EUTK_ECOLI   | 279.49 | Ethanolamine utilization protein EutK                  | Transport and catabolism |
| FEPC_ECOLI   | 183.26 | Ferric enterobactin transport ATP-binding protein FepC | Membrane transport       |
| SECY_ECOLI   | 189.49 | Protein translocase subunit SecY                       | Membrane transport       |
| FHUA_ECOLI   | 244.6  | Ferrichrome-iron receptor                              | Membrane transport       |
| YADI_ECOLI   | 475.17 | Putative phosphotransferase enzyme IIA component YadI  | Membrane transport       |
| ACRA_ECOLI   | 273.93 | Multidrug efflux pump subunit AcrA                     | Membrane transport       |
| NIKA_ECOLI   | 244.58 | Nickel-binding periplasmic protein                     | Membrane transport       |

|            |        |                                                              |                                    |
|------------|--------|--------------------------------------------------------------|------------------------------------|
| DPPA_ECOLI | 273.55 | Periplasmic dipeptide transport protein                      | Cellular motility                  |
| FLIG_ECOLI | 283.19 | Flagellar motor switch protein FliG                          | Cellular motility                  |
| YHGF_ECOLI | 237.56 | Protein YhgF                                                 | Cellular metabolism                |
| YAEF_ECOLI | 303.74 | Probable endopeptidase YaeF                                  | Cellular metabolism                |
| CPTA_ECOLI | 254.32 | Toxin CptA                                                   | Cellular metabolism                |
| FRSA_ECOLI | 203.33 | Esterase FrsA                                                | Energy metabolism                  |
| MTLD_ECOLI | 229.26 | Mannitol-1-phosphate 5-dehydrogenase                         | Carbohydrate metabolism            |
| GARD_ECOLI | 174.22 | Galactarate dehydratase (L-threo-forming)                    | Carbohydrate metabolism            |
| MASY_ECOLI | 240.63 | Malate synthase A                                            | Carbohydrate metabolism            |
| MALQ_ECOLI | 209.32 | 4-alpha-glucanotransferase                                   | Carbohydrate metabolism            |
| KDGK_ECOLI | 255.59 | 2-dehydro-3-deoxygluconokinase                               | Carbohydrate metabolism            |
| WCAE_ECOLI | 388.26 | Putative colanic acid biosynthesis glycosyl transferase WcaE | Metabolism and glycan biosynthesis |
| PPIC_ECOLI | 720.19 | Peptidyl-prolyl cis-trans isomerase C                        | Protein metabolism                 |

|            |        |                                                    |                                          |
|------------|--------|----------------------------------------------------|------------------------------------------|
| HSLO_ECOLI | 246.89 | 33 kDa chaperonin                                  | Protein metabolism                       |
| TDCG_ECOLI | 251.32 | L-serine dehydratase TdcG                          | Amino acid metabolism                    |
| AK3_ECOLI  | 200.63 | Lysine-sensitive aspartokinase 3                   | Amino acid metabolism                    |
| DDLB_ECOLI | 280.3  | D-alanine--D-alanine ligase B                      | Metabolism of other amino acids          |
| PLSB_ECOLI | 218.31 | Glycerol-3-phosphate acyltransferase               | Lipid metabolism                         |
| THIL_ECOLI | 255.05 | Thiamine-monophosphate kinase                      | Metabolism of cofactors and vitamins     |
| PPNK_ECOLI | 238.3  | NAD kinase                                         | Metabolism of cofactors and vitamins     |
| RIBD_ECOLI | 255.09 | Riboflavin biosynthesis protein RibD               | Metabolism of cofactors and vitamins     |
| GUAC_ECOLI | 235.03 | GMP reductase                                      | Nucleotide metabolism                    |
| NRDD_ECOLI | 209.98 | Anaerobic ribonucleoside-triphosphate reductase    | Nucleotide metabolism                    |
| ENTB_ECOLI | 353.76 | Enterobactin synthase component B                  | Metabolism of terpenoids and polyketides |
| YNEI_ECOLI | 217.2  | Succinate semialdehyde dehydrogenase [NAD(P)+] Sad | Oxidation/Reduction                      |

|            |        |                                                            |                         |
|------------|--------|------------------------------------------------------------|-------------------------|
| DHSB_ECOLI | 228.58 | Succinate dehydrogenase iron-sulfur subunit                | Oxidation/Reduction     |
| YKGC_ECOLI | 199.51 | Probable pyridine nucleotide-disulfide oxidoreductase RclA | Oxidation/Reduction     |
| FDOG_ECOLI | 220.31 | Formate dehydrogenase-O major subunit                      | Signal transduction     |
| STFR_ECOLI | 195.66 | Side tail fiber protein homolog from lambdoid prophage Rac | Host interaction        |
| YOAB_ECOLI | 376.62 | RutC family protein YoaB                                   | Biofilm formation       |
| YJAH_ECOLI | 416.62 | Uncharacterized protein YjaH                               | Uncharacterized protein |
| YMFN_ECOLI | 270.86 | Uncharacterized protein YmfN                               | Uncharacterized protein |
| YAIV_ECOLI | 269.7  | Uncharacterized protein YaiV                               | Uncharacterized protein |
| YHIN_ECOLI | 258.38 | Uncharacterized protein YhiN                               | Uncharacterized protein |
| YHCC_ECOLI | 420.17 | Protein YhcC                                               | Uncharacterized protein |
| YACC_ECOLI | 467.77 | Uncharacterized protein YacC                               | Uncharacterized protein |
| YCCE_ECOLI | 351.62 | Uncharacterized protein YccE                               | Uncharacterized protein |
